# Supplementary material for: Infiltration of T Cells into a Three-Dimensional Psoriatic Skin Model Mimics Pathological Key Features
Source: MDPI journal article supplement (doi:10.3390/ijms20071670), 2019-04-03
Supplement: s1 [file s1]

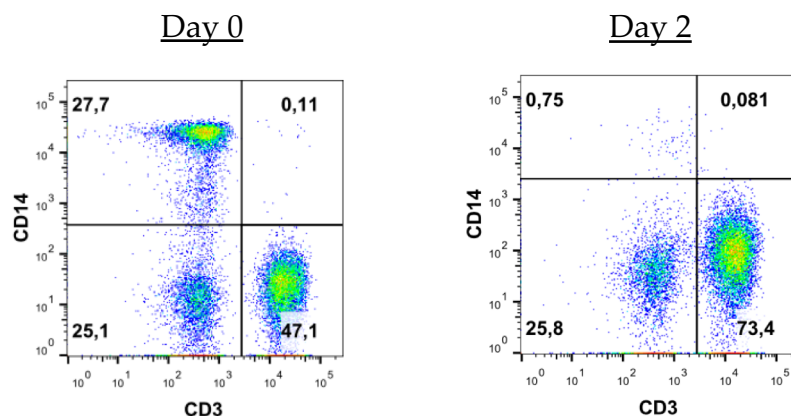

**Figure S1.** Flow cytometric quantification of CD14<sup>+</sup> and CD3<sup>+</sup> populations on day 0 and after 2 days of T cell activation. Cells were gated for viable cells.

**Table S1.** Primary antibodies used for immunofluorescence analysis.

| Antibodies         | Host   | Company                   | Dilution factor |
|--------------------|--------|---------------------------|-----------------|
| CD3 (F7.2.38)      | Mouse  | Dako, CA, USA             | 1:5             |
| Keratin-14         | Rabbit | Biolegend, CA, USA        | 1:1600          |
| Keratin-10         | Rabbit | Sigma, MO, USA,           | 1:100           |
| Ki-67              | Rabbit | Abcam, Cambridge, England | 1:400           |
| Involucrin         | Rabbit | Abcam, Cambridge, England | 1:600           |
| Loricrin           | Rabbit | Proteintech, IL, USA      | 1:1000          |
| Transglutaminase 1 | Rabbit | Proteintech, IL, USA      | 1:1600          |
